# Supplementary material for: Constraining probabilistic chloride mass-balance recharge estimates using baseflow and remotely sensed evapotranspiration: the Cambrian Limestone Aquifer in northern Australia
Source: Springer Nature journal article supplement (doi:10.1007/s10040-021-02323-1), 2021-03-18
Supplement: MOESM1 [file 18981508]

## Electronic supplementary material – Hydrogeology Journal

### Constraining probabilistic chloride mass-balance recharge estimates using baseflow and remotely sensed evapotranspiration: the Cambrian Limestone Aquifer in northern Australia

Russell S Crosbie and Praveen Kumar Rachakonda

[russell.crosbie@csiro.au](mailto:russell.crosbie@csiro.au)

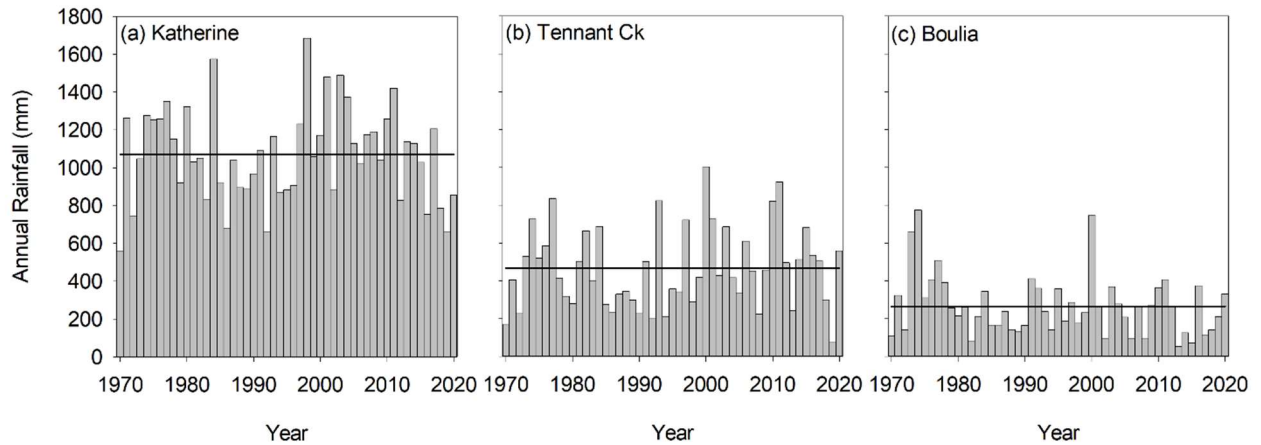

Figure S1 Annual series of rainfall for Katherine, Tennant Ck and Boulia.

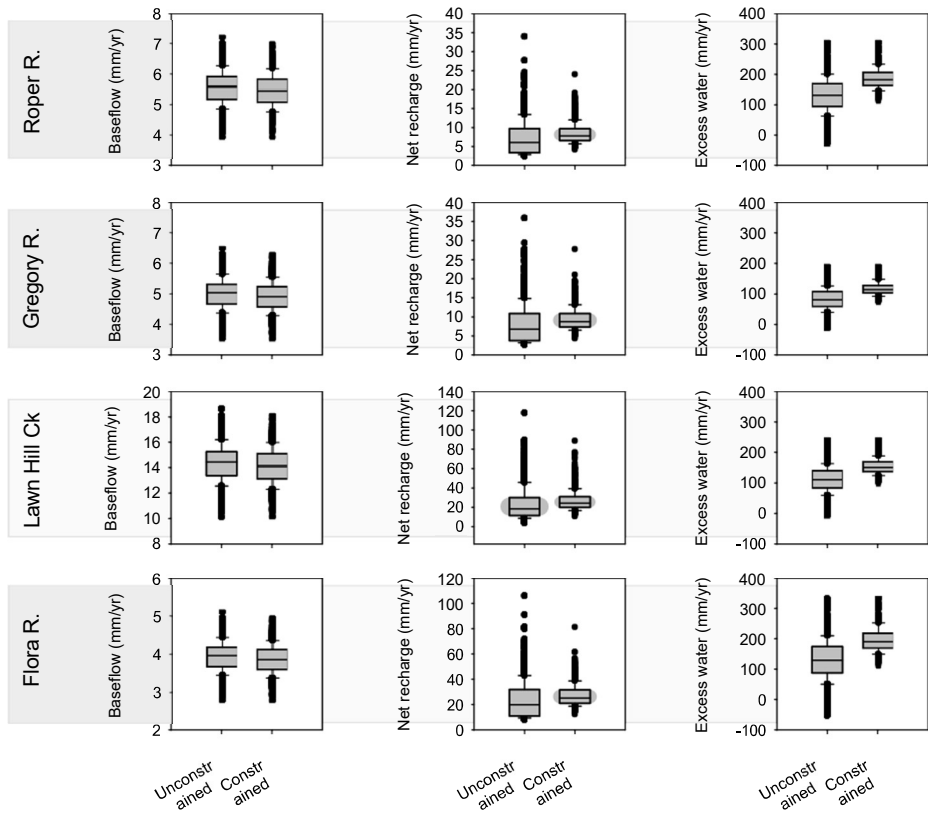

Figure S2. Boxplots of the unconstrained versus constrained recharge for the four selected groundwater catchments.

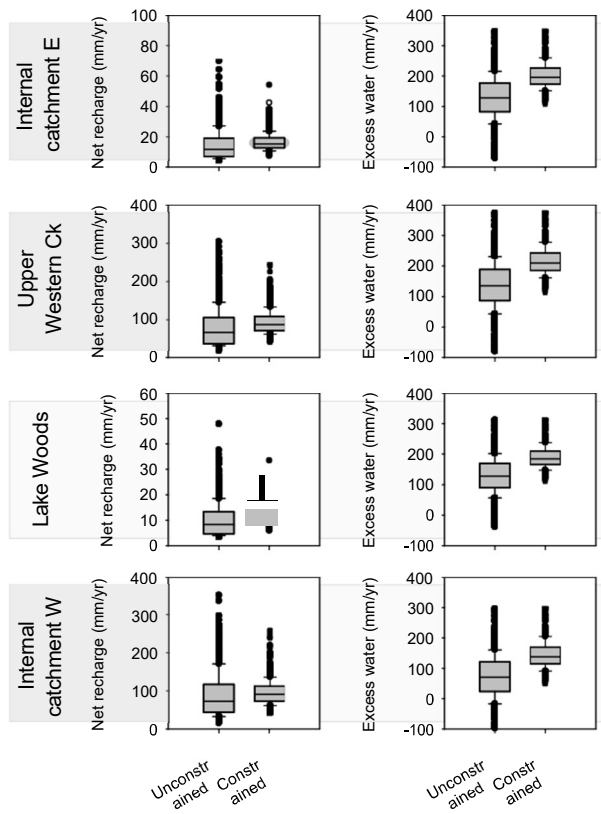

Figure S3. Boxplots of the unconstrained versus constrained recharge for the four selected internally draining catchments.
